# Supplementary material for: Enhanced Performance of Supported Ternary Metal Catalysts for the Oxidation of Toluene in the Presence of Trichloroethylene
Source: MDPI journal article supplement (doi:10.3390/catal12050541), 2022-05-16
Supplement: s1 [file s1]

Archive with 1 entries (1 files):
- catalysts-1690142-supplementary.pdf
