# Supplementary material for: Enhanced Performance of Supported Ternary Metal Catalysts for the Oxidation of Toluene in the Presence of Trichloroethylene
Source: MDPI journal article supplement (doi:10.3390/catal12050541), 2022-05-16
Supplement: s1 [file s1 › catalysts-1690142-supplementary.pdf]

## **Supplementary Material**

### **Enhanced performance of supported ternary metal catalysts for the oxidation of toluene in the presence of trichloroethylene**

Tiantian Dong<sup>1</sup>, Kun Liu<sup>2</sup>, Ruyi Gao<sup>1</sup>, Hualian Chen<sup>1</sup>, Xiaohui Yu<sup>1</sup>, Zhiquan Hou<sup>1</sup>, Lin Jing<sup>1</sup>, Jiguang Deng<sup>1</sup>, Yuxi Liu<sup>1\*</sup>, Hongxing Dai<sup>1\*</sup>

<sup>1</sup>Beijing Key Laboratory for Green Catalysis and Separation, Key Laboratory of Beijing on Regional Air Pollution Control, Key Laboratory of Advanced Functional Materials, Education Ministry of China, Department of Environmental Chemical Engineering, Faculty of Environment and life, Beijing University of Technology, Beijing 100124, China

<sup>2</sup>Institute of Optical Functional Materials for Biomedical Imaging, School of Chemistry and Pharmaceutical Engineering, Shandong First Medical University & Shandong Academy of Medical Sciences, Taian, 271016, China

\* Corresponding author.

E-mail address: yxliu@bjut.edu.cn (Dr. Y.X. Liu); hxdai@bjut.edu.cn (Prof. H.X. Dai)

Tel. No.: +8610-6739-6118.

## Content

| Item                                        | Page |
|---------------------------------------------|------|
| <b>Catalyst characterization procedures</b> | 3–5  |
| <b>Figure S1</b>                            | 6    |
| <b>Figure S2</b>                            | 7    |
| <b>Figure S3</b>                            | 8    |
| <b>Figure S4</b>                            | 9    |
| <b>Figure S5</b>                            | 10   |
| <b>Table S1</b>                             | 11   |
| <b>Table S2</b>                             | 12   |

### Catalyst characterization procedures:

X-ray diffraction (XRD) patterns of the samples were obtained on a Bruker D8 Advance diffractometer with Cu  $K\alpha$  radiation and a nickel filter ( $\lambda = 0.15406$  nm). BET (Brunauer-Emmett-Teller) surface areas and pore-size distributions of the samples were determined via N<sub>2</sub> adsorption at  $-196$  °C on a Micromeritics ASAP 2020 analyzer, with the samples being outgassed at  $300$  °C under vacuum for 2.5 h. The actual metal contents in the as-obtained samples were determined using the inductively coupled plasma–atomic emission spectroscopic (ICP–AES) technique on a Thermo Electron IRIS Intrepid ER/S spectrometer. Each sample was dissolved in a mixture of concentrated HCl (37 wt%) and HNO<sub>3</sub> (75 wt%) aqueous solutions with a volumetric ratio of 3 : 1 prior to analysis.

Transmission electron microscopic (TEM) images of the as-obtained samples were recorded using a JEOL JEM-2010 instrument. The X-ray photoelectron spectroscopy (XPS) was used to determine the Pt 4f, W 4f, Ru 3p, O 1s, Cr 2p and Mn 2p binding energies (BEs) of the surface species with Mg  $K\alpha$  ( $h\nu = 1253.6$  eV) as the excitation source. The C 1s signal at 284.6 eV was taken as reference for BE calibration.

Hydrogen temperature-programmed reduction (H<sub>2</sub>-TPR) experiments were carried out on a chemical adsorption analyzer (Autochem II 2920, Micromeritics). Before TPR measurement, ca. 0.05 g of the sample (40–60 mesh) was loaded to a fixed-bed U-shaped quartz microreactor (i.d. = 4 mm) and pretreated in an 20 vol% O<sub>2</sub>/He flow of 30 mL/min at  $300$  °C for 1 h. After being cooled to room temperature (RT) at the same atmosphere, the sample was purged in a N<sub>2</sub> flow of 30 mL/min for 30 min. The pretreated sample was exposed to a flow (30 mL/min) of 10 vol% H<sub>2</sub>/Ar mixture and heated from RT to  $900$  °C at a ramp of  $10$  °C/min.

The alteration in H<sub>2</sub> concentration of the effluent was monitored online by the chemical adsorption analyzer. Temperature-programmed desorption of oxygen (O<sub>2</sub>-TPD) was carried out on the apparatus same as that used in the H<sub>2</sub>-TPR experiments. The sample (0.05 g) was first treated at 300 °C for 1 h in a 20 vol% O<sub>2</sub>/He flow of 30 mL/min and cooled to RT in the same atmosphere, and kept in the same flow for 1 h. Before the sample was heated from RT to 900 °C at a ramp of 10 °C/min, a He flow of 30 mL/min was employed to remove the O<sub>2</sub> left in the U-shaped quartz microreactor for 30 min, and the oxygen concentration in the effluent was continuously monitored by a thermal conductivity detector (TCD).

Temperature-programmed desorption of toluene and TCE (toluene+TCE-TPD) was carried out on the apparatus same as that used in the H<sub>2</sub>-TPR experiments. Prior to the test, 0.05 g of the sample was pretreated in a 20 vol% O<sub>2</sub>/He flow of 30 mL/min at 300 °C for 1 h with a ramp of 10 °C/min. After the sample was cooled to 50 °C at the same atmosphere, the mixed VOCs were purged into samples through gas cylinder until the sample reached an adsorption saturation of mixed VOCs, and then the sample was flushed with a He flow of 30 mL/min until the baseline was smooth. The system was heated up to 900 °C at a ramp of 10 °C/min in the He atmosphere. The products were detected by the mass spectrometer. Temperature-programmed surface reaction of the mixed VOCs (toluene+TCE-TPSR) was carried out with the pretreatments same as that used in the VOCs-TPD. The system was heated up to 900 °C at a ramp of 10 °C/min under the atmosphere of 20 vol% O<sub>2</sub> and toluene-TCE mixture. The products were detected by the mass spectrometer.

The metal dispersion was measured using chemisorption (AutoChem II 2920, Micromeritics). The sample was reduced in a H<sub>2</sub> flow (30 mL/min) at 200 °C for 2 h, purged

with a He flow (30 mL/min) for 1 h and cooled to 50 °C. Then, it was saturated with pulses of CO. The uptake of CO during the chemisorption was measured by a TCD.

*In situ* DRIFTS spectra were recorded on a Nicolet 6700 (TENSOR II (BRUKER)) FT-IR spectrometer with a liquid-nitrogen-cooled MCT detector. In the *in situ* DRIFTS studies, 30 mg of the sample was loaded to a high-temperature IR cell with a SeZn window, a N<sub>2</sub> flow (30 mL/min) was passed through the IR cell at 30 °C for 20 min, and the background spectrum was recorded. Subsequently, the N<sub>2</sub> flow was switched to the mixture gas (1000 ppm toluene + 200 ppm TCE + 20 vol% O<sub>2</sub> + N<sub>2</sub> (balance)) flow of 16.67 mL/min at elevated temperatures from RT to 50, 110, 210, 310 and 400 °C, respectively, and the *in situ* DRIFTS spectra were recorded when the sample was kept at the given temperature for 30 min. The DRIFT spectra were recorded with an accumulation of 32 scans and a spectrum resolution of 4 cm<sup>-1</sup>.

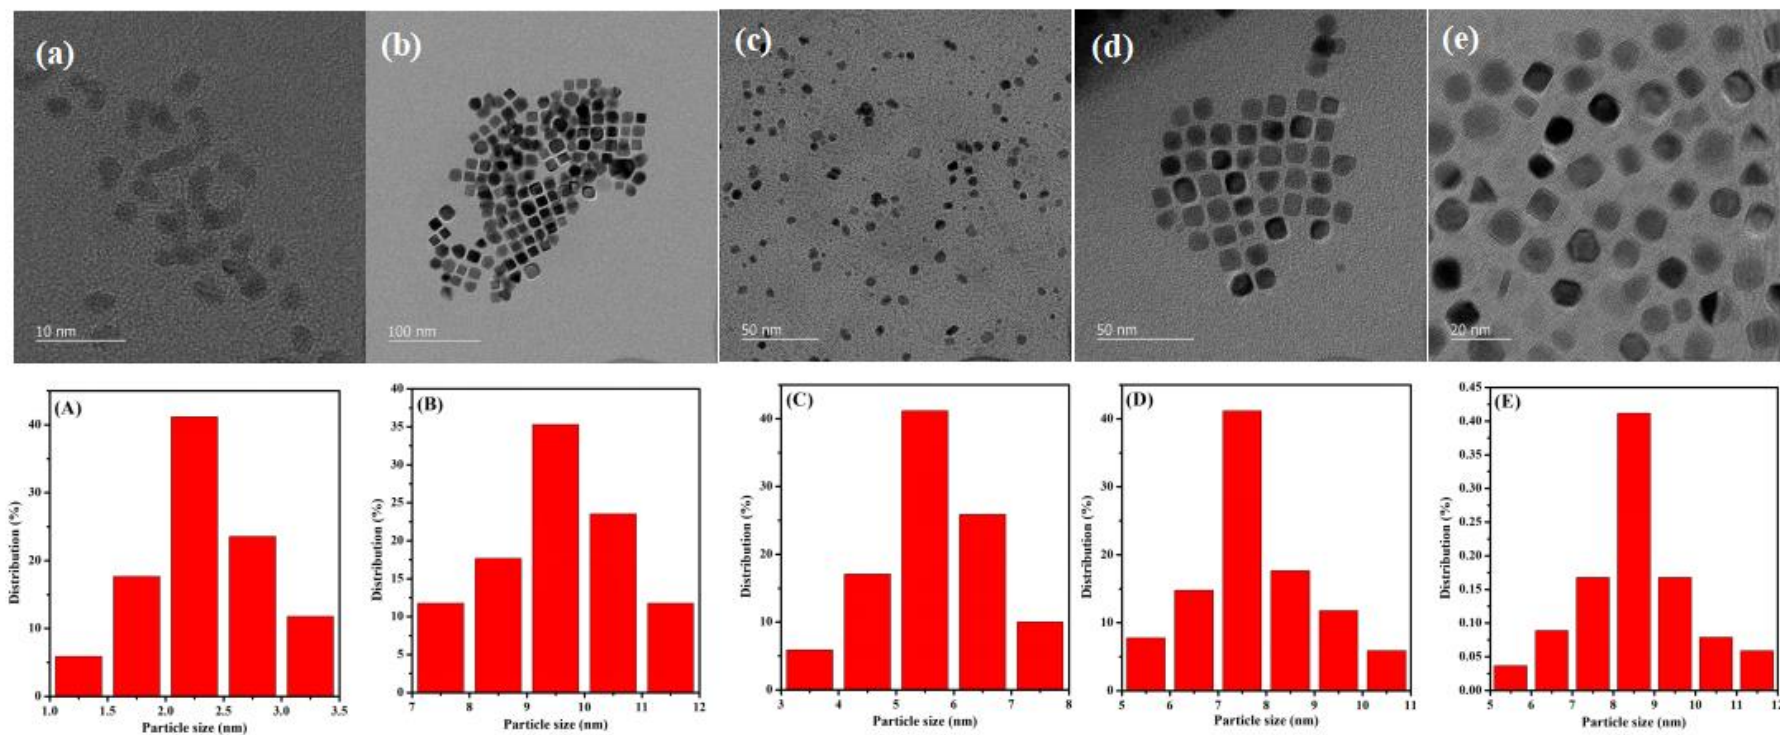

**Figure S1.** TEM images and particle-size distributions of (a, A) Pt, (b, B) PtW, (c, C) PtWRu, (d, D) PtWCr, and (e, E) PtWMn NPs.

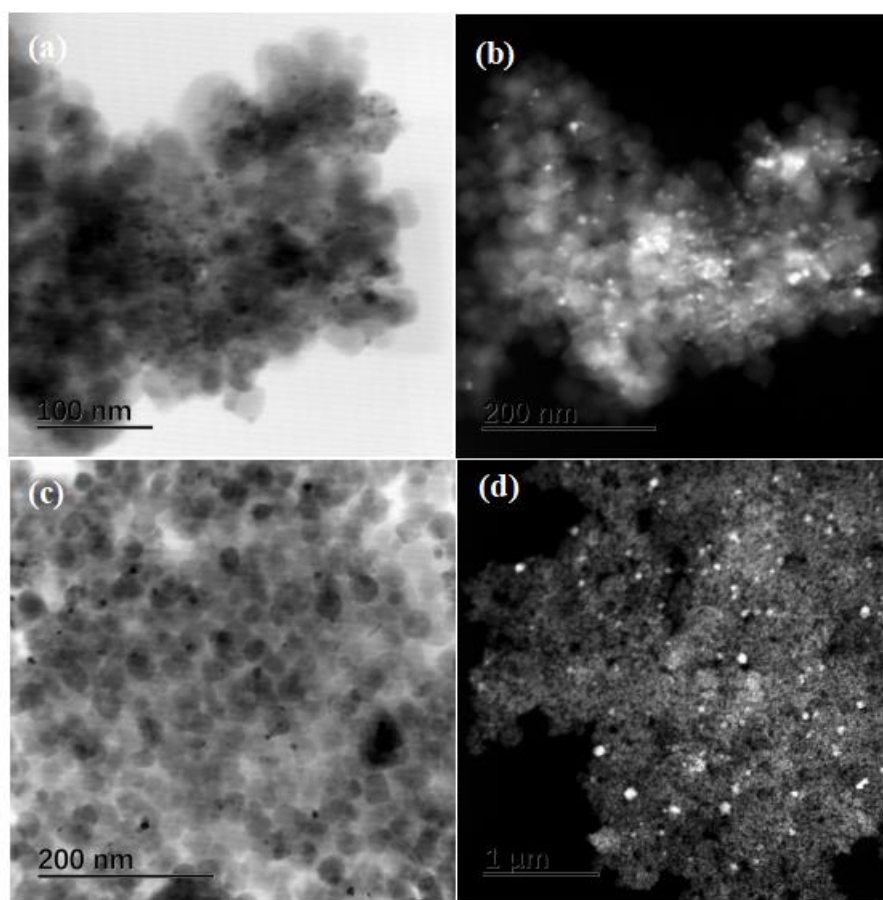

**Figure S2.** (a) TEM and (b) HAADF-STEM images of Pt/TiO<sub>2</sub>, (c) TEM and (d) HAADF-STEM images of PtW/TiO<sub>2</sub>.

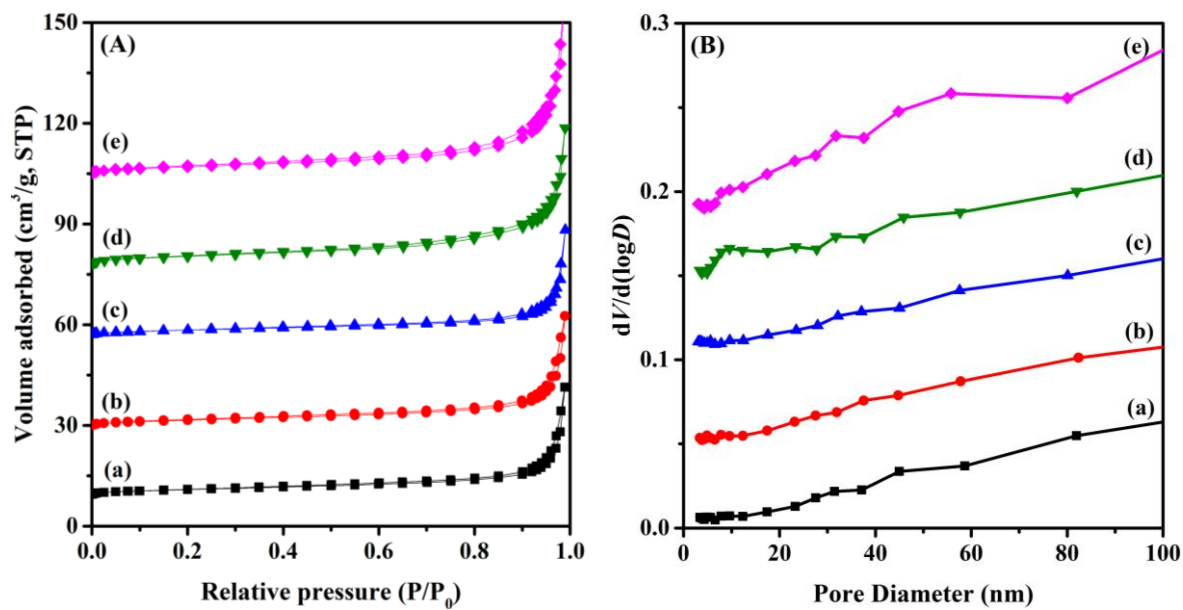

**Figure S3.** (A) Nitrogen adsorption–desorption isotherms and (B) pore-size distributions of (a) Pt/TiO<sub>2</sub>, (b) PtW/TiO<sub>2</sub>, (c) PtWRu/TiO<sub>2</sub>, (d) PtWCr/TiO<sub>2</sub>, and (e) PtWMn/TiO<sub>2</sub>.

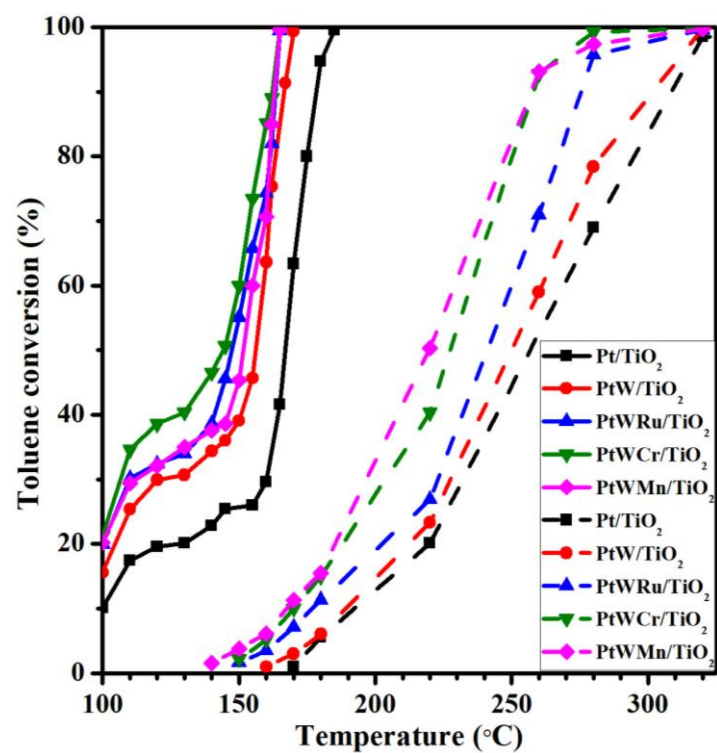

**Figure S4.** Toluene conversion as a function of temperature over the samples (solid curves: in the absence of TCE; dotted curves: in the presence of 200 ppm TCE).

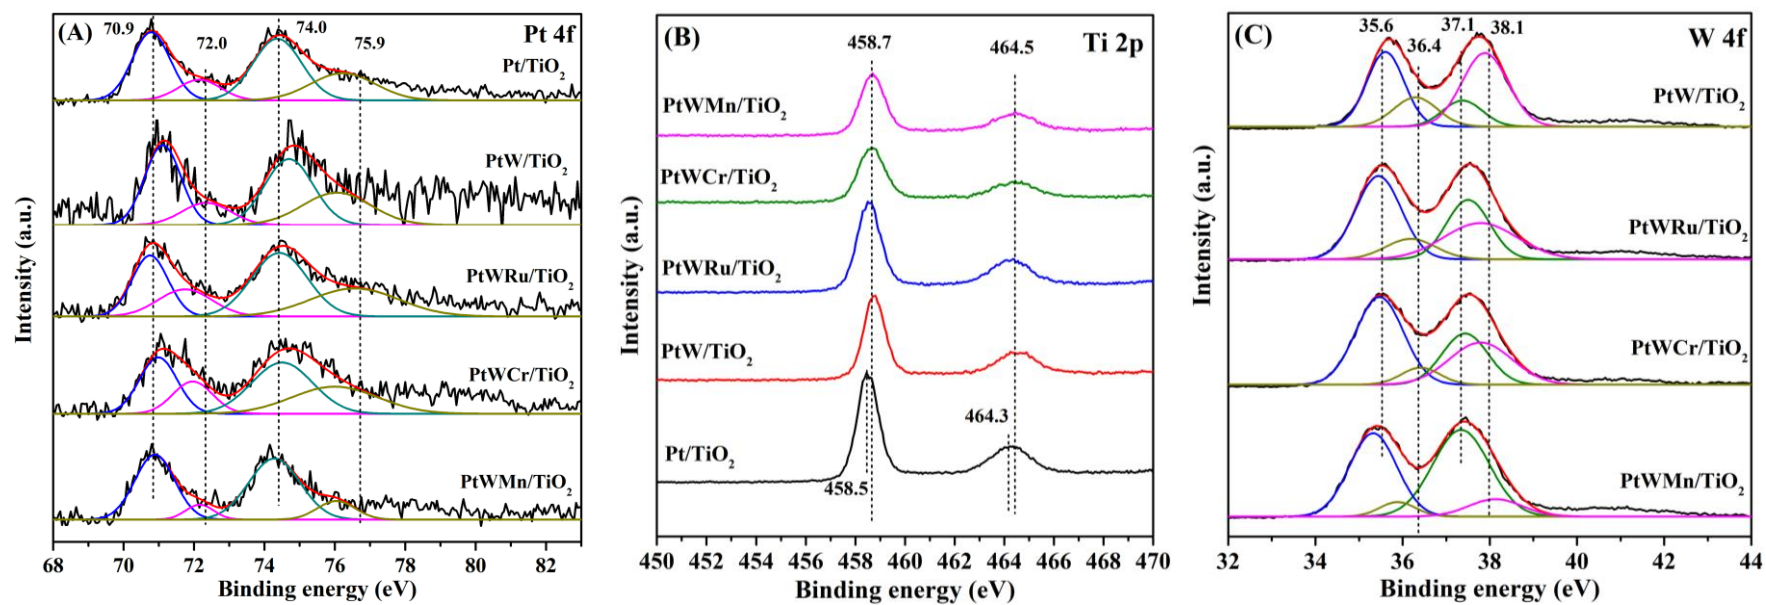

**Figure S5.** XPS spectra of (A) Pt 4f, (B) Ti 2p and (C) W 4f in each samples.

**Table S1.**  $T_{50\%}$  and  $T_{90\%}$  for toluene and TCE oxidation over the as-obtained samples.

| Sample                 | Toluene conversion<br>(alone) |                 | Toluene conversion (in<br>mixture of toluene&TCE) |                 | TCE conversion (in<br>mixture of toluene&TCE) |                 |
|------------------------|-------------------------------|-----------------|---------------------------------------------------|-----------------|-----------------------------------------------|-----------------|
|                        | $T_{50\%}$ (°C)               | $T_{90\%}$ (°C) | $T_{50\%}$ (°C)                                   | $T_{90\%}$ (°C) | $T_{50\%}$ (°C)                               | $T_{90\%}$ (°C) |
| Pt/TiO <sub>2</sub>    | 164                           | 178             | 260                                               | 310             | 340                                           | >500            |
| PtW/TiO <sub>2</sub>   | 158                           | 162             | 250                                               | 296             | 300                                           | 378             |
| PtWRu/TiO <sub>2</sub> | 148                           | 160             | 240                                               | 275             | 272                                           | 305             |
| PtWCr/TiO <sub>2</sub> | 144                           | 160             | 225                                               | 258             | 276                                           | 300             |
| PtWMn/TiO <sub>2</sub> | 150                           | 159             | 216                                               | 255             | 272                                           | 318             |

**Table S2.** Assignments of the DRIFTS bands of the samples.

| Wavenumber (cm <sup>-1</sup> ) | Assignment                                                                 | Ref.    |
|--------------------------------|----------------------------------------------------------------------------|---------|
| 3853                           | the vibration of OH                                                        | [39]    |
| 2930                           | Carbon–hydrogen stretching vibration bands of the aromatic rings (toluene) | [37]    |
| 1614                           | Water                                                                      | [46]    |
| 1602                           | benzene ring vibration peak of the toluene                                 | [41,42] |
| 1365                           | Tertiary alcohol characteristic                                            | [43]    |
| 1098                           | Primary alcohol characteristic                                             | [44]    |
| 1655–1708                      | Symmetric stretching vibration of C=C                                      | [45]    |
